# Supplementary material
Source: HighWire-hosted journal article supplement (https://jnm.snmjournals.org/highwire/filestream/95501/field_highwire_adjunct_files/0/224543_Supplemental_Data.pdf)
Supplement: 224543_Supplemental_Data.pdf [file 224543_Supplemental_Data.pdf]

## Imaging protocol

A PET/CT scan (Biograph mCT Siemens Healthcare, Knoxville TN) was acquired 5 min. after i.v. administration of a mean dose of  $627 \pm 25$  MBq of  $^{11}\text{C}$ -choline combined with a diagnostic CT in venous phase (120 ml Ultravist 370 Bayer Healthcare Pharmaceuticals, Berlin, Germany, flow rate 2.5 ml/s). Additional late pelvic images were performed 20 min after injection. On the same day at least 3 hours later, a second PET scan was performed using  $165 \pm 13$  MBq of  $^{68}\text{Ga}$  PSMA. If possible, the tracer injection was combined with an injection of 40 mg furosemide to facilitate micturition before PET examination. To reduce radiation exposure, a low dose CT scan was performed for attenuation correction of the  $^{68}\text{Ga}$ -PSMA PET data (n=83). In patients with contraindications for contrast agents, a diagnostic CT scan without contrast was performed (n=4). Examination field ranged from the skull base to mid-thigh. For the detailed examination protocol, see Schwenck et al. 2017 (16).

**Supplemental Table 1.** Treatment strategy depending on PET-staging, postoperative stage and previous radiotherapy.

| PET Staging at BCR |     |       | Postoperative stage |     |    | Curative radiotherapeutic options without previous RT |        |              |      | Remaining options after |            |
|--------------------|-----|-------|---------------------|-----|----|-------------------------------------------------------|--------|--------------|------|-------------------------|------------|
| rcT                | rcN | cM    | pT                  | pN  | cM | P. fossa                                              | Pelvis | N1-Boost     | SBRT | RT                      | RT         |
|                    |     |       |                     |     |    |                                                       |        |              |      | P. fossa                | pelvis     |
| 0                  | 0   | 0     | 2-4                 | 0   | 0  | 66Gy                                                  |        |              |      | palliative              | palliative |
| 0                  | 0   | 0     | 2-4                 | 1   | 0  | 66Gy                                                  | 50.4Gy |              |      | palliative              | palliative |
| 2-4                | 0   | 0     | 2-4                 | 0   | 0  | $\geq 70$ Gy                                          |        |              |      | palliative              | palliative |
| 2-4                | 0   | 0     | 2-4                 | 1   | 0  | $\geq 70$ Gy                                          | 50.4Gy |              |      | palliative              | palliative |
| 0                  | 1   | 0     | any                 | any | 0  | 66Gy                                                  | 50.4Gy | $\geq 60$ Gy |      | ~                       | palliative |
| 2-4                | 1   | 0     | any                 | any | 0  | $\geq 70$ Gy                                          | 50.4Gy | $\geq 60$ Gy |      | palliative              | palliative |
| 0                  | 0   | oligo | any                 | any | 0  |                                                       |        |              | x    | ~                       | ~          |
| 2-4                | 0   | oligo | any                 | any | 0  | $\geq 70$ Gy                                          | Option |              | x    | palliative              | palliative |
| 2-4                | 1   | oligo | any                 | any | 0  | $\geq 70$ Gy                                          | 50.4Gy | $\geq 60$ Gy | x    | palliative              | palliative |
| 0                  | 1   | oligo | any                 | any | 0  | 66Gy                                                  | 50.4Gy | $\geq 60$ Gy | x    | ~                       | palliative |

Abbreviations: RT=radiotherapy, BCR= biochemical recurrence, P=prostatic, “~” means equal curative treatment options like group without previous RT

**Supplemental Table 2.** Patients' characteristics

| <b>Characteristic</b>                               | <b>n/measure</b> | <b>%</b> |
|-----------------------------------------------------|------------------|----------|
| <b>pTumor stage</b>                                 |                  |          |
| T2a                                                 | 1                | 1.2      |
| T2b                                                 | 3                | 3.6      |
| T2c                                                 | 15               | 18.1     |
| T3a                                                 | 19               | 22.9     |
| T3b                                                 | 37               | 44.6     |
| T4                                                  | 3                | 3.6      |
| n.a.                                                | 5                | 6.0      |
| <b>Gleason score</b>                                |                  |          |
| ≤6                                                  | 5                | 6.0      |
| 7a (3+4)                                            | 11               | 13.3     |
| 7b (4+3)                                            | 22               | 26.5     |
| 8                                                   | 18               | 21.7     |
| 9                                                   | 21               | 25.3     |
| 10                                                  | 1                | 1.2      |
| n.a.                                                | 5                | 6.0      |
| <b>PSA-level at PET date (ng/ml)</b>                |                  |          |
| Mean (Median): 4.0 (1.9)                            |                  |          |
| ≤0.5                                                | 9                | 10.8     |
| 0.5-1                                               | 7                | 8.4      |
| 1-2                                                 | 27               | 32.5     |
| 2-5                                                 | 26               | 31.3     |
| >5                                                  | 13               | 15.7     |
| n.a.                                                | 1                | 1.2      |
| <b>Initial PSA level at time of surgery (ng/ml)</b> |                  |          |
| Mean (Median): 17.8 (10.5)                          |                  |          |
| ≤5                                                  | 7                | 8.4      |
| 5-10                                                | 24               | 28.9     |
| 10-20                                               | 25               | 30.1     |
| 20-50                                               | 13               | 15.7     |
| >50                                                 | 2                | 2.4      |
| n.a.                                                | 12               | 14.5     |

**Supplemental Table 3.** TNM-staging according to PET and CT depending on previous radiotherapy. The given numbers indicate the findings of local recurrences, nodal and distant metastases. Oligometastases (M1a-c; n≤5) were distinguished from multiple distant metastases (M1; n>5). Manifestation of oligometastases at different locations was indicated (i.e. M1a/b=M1a and M1b).

| Previous radiotherapy            | Imaging modality            | rT+ | rN1 | cM1 | Oligo- |     |     | Multiple |    |
|----------------------------------|-----------------------------|-----|-----|-----|--------|-----|-----|----------|----|
|                                  |                             |     |     |     | M1a    | M1b | M1c | M1a/b    | M1 |
| <b>None</b><br>(n=39)            | <sup>68</sup> Ga-PSMA-PET   | 5   | 23  | 13  | 2      | 5   | 0   | 3        | 3  |
|                                  | <sup>11</sup> C-choline-PET | 4   | 16  | 10  | 3      | 3   | 0   | 2        | 2  |
|                                  | CT                          | 4   | 23  | 14  | 3      | 4   | 0   | 5        | 2  |
| <b>Prostatic fossa</b><br>(n=33) | <sup>68</sup> Ga-PSMA-PET   | 6   | 18  | 16  | 5      | 5   | 1   | 0        | 5  |
|                                  | <sup>11</sup> C-choline-PET | 7   | 16  | 15  | 5      | 6   | 1   | 0        | 3  |
|                                  | CT                          | 5   | 15  | 19  | 4      | 6   | 1   | 3        | 5  |
| <b>Pelvis</b><br>(n=11)          | <sup>68</sup> Ga-PSMA-PET   | 0   | 1   | 9   | 2      | 4   | 0   | 0        | 3  |
|                                  | <sup>11</sup> C-choline-PET | 0   | 2   | 10  | 3      | 4   | 0   | 0        | 3  |
|                                  | CT                          | 1   | 4   | 8   | 3      | 2   | 0   | 1        | 2  |
| <b>All</b><br>(n=83)             | <sup>68</sup> Ga-PSMA-PET   | 11  | 42  | 38  | 9      | 14  | 1   | 3        | 11 |
|                                  | <sup>11</sup> C-choline-PET | 11  | 34  | 35  | 11     | 13  | 1   | 2        | 8  |
|                                  | CT                          | 10  | 42  | 41  | 10     | 12  | 1   | 9        | 9  |

**Supplemental Table 4.** Down- and upstaging for T-, N- and M-stage depending on imaging modality and previous radiotherapy.

| <b>Previous radiotherapy</b>  | <b>Migration of T-, N-, M- findings</b> | <b>PSMA-PET vs. Choline-PET</b> | <b>PSMA-PET vs. CT</b> | <b>Choline-PET vs. CT</b> |
|-------------------------------|-----------------------------------------|---------------------------------|------------------------|---------------------------|
| <b>None (n=39)</b>            | T-Upstaging                             | 1                               | 4                      | 4                         |
|                               | T-Downstaging                           | 0                               | 3                      | 4                         |
|                               | N-Upstaging                             | 8                               | 6                      | 1                         |
|                               | N-Downstaging                           | 1                               | 6                      | 8                         |
|                               | M-Upstaging                             | 5                               | 4                      | 3                         |
|                               | M-Downstaging                           | 2                               | 5                      | 7                         |
| <b>Prostatic fossa (n=33)</b> | T-Upstaging                             | 0                               | 3                      | 4                         |
|                               | T-Downstaging                           | 1                               | 2                      | 2                         |
|                               | N-Upstaging                             | 2                               | 7                      | 5                         |
|                               | N-Downstaging                           | 0                               | 4                      | 4                         |
|                               | M-Upstaging                             | 2                               | 6                      | 4                         |
|                               | M-Downstaging                           | 1                               | 9                      | 8                         |
| <b>Pelvis (n=11)</b>          | T-Upstaging                             | 0                               | 0                      | 0                         |
|                               | T-Downstaging                           | 0                               | 1                      | 1                         |
|                               | N-Upstaging                             | 0                               | 1                      | 1                         |
|                               | N-Downstaging                           | 1                               | 4                      | 3                         |
|                               | M-Upstaging                             | 0                               | 2                      | 2                         |
|                               | M-Downstaging                           | 1                               | 1                      | 0                         |
| <b>All (n=83)</b>             | T-Upstaging                             | 1                               | 7                      | 8                         |
|                               | T-Downstaging                           | 1                               | 6                      | 7                         |
|                               | N-Upstaging                             | 10                              | 14                     | 7                         |
|                               | N-Downstaging                           | 2                               | 14                     | 15                        |
|                               | M-Upstaging                             | 7                               | 12                     | 9                         |
|                               | M-Downstaging                           | 4                               | 15                     | 15                        |

**Supplemental Table 5.** Treatment routines and respective costs according to German “EBM” and “Rote Liste”.

| <b>Curative radiotherapeutic options</b>  |               |                 |             | <b>Costs</b>      |
|-------------------------------------------|---------------|-----------------|-------------|-------------------|
| <b>Prostate bed</b>                       | <b>Pelvis</b> | <b>N1-Boost</b> | <b>SBRT</b> |                   |
| 66Gy                                      |               |                 |             | 3,304.46 €        |
| 66Gy                                      | 50.4Gy        |                 |             | 6,086.86 €        |
| ≥70Gy                                     |               |                 |             | 3,414.20 €        |
| ≥70Gy                                     | 50.4Gy        |                 |             | 6,196.60 €        |
| 66Gy                                      | 50.4Gy        | ≥60Gy           |             | 6,352.90 €        |
| ≥70Gy                                     | 50.4Gy        | ≥60Gy           |             | 6,462.64 €        |
|                                           |               |                 | x           | 1,658.36 €        |
| ≥70Gy                                     | Option        |                 | x           | 5,072.56 €        |
| ≥70Gy                                     | 50.4Gy        | ≥60Gy           | x           | 7,854.96 €        |
| 66Gy                                      | 50.4Gy        | ≥60Gy           | x           | 8,011.26 €        |
| <b>Palliative treatment (5 years ADT)</b> |               |                 |             | <b>9,731.60 €</b> |

## **ABBREVIATIONS**

ADT (androgen deprivation therapy)

BCR (biochemical recurrence)

CT (Computed tomography)

DM (distant metastasis)

EBM („Einheitlicher Bewertungsmaßstab“)

i.v. (intravenous)

LR (local recurrence)

MBq (mega Becquerel)

NR (nodal recurrence)

PC (Prostate cancer)

PET (Positron-Emission Tomography)

PSMA (prostate-specific membrane antigen)

RT (radiotherapy)

SRT (salvage radiotherapy)

SBRT (stereotactic body radiotherapy)

TNM (tumor, node, metastasis)

vs. (versus)
